# Supplementary material for: Dynamic changes of anterior segment in patients with different stages of primary angle-closure in both eyes and normal subjects
Source: PubMed Central journal article supplement (PMC5436810; doi:10.1371/journal.pone.0177769), 2017-05-18
Supplement: pone.0177769.s001.pdf [file pone.0177769.s001.pdf]

**S1 Table. Intraobserver repeatability of anterior segment parameters in 60 recruited eyes.**

|                                          | First Measurement | Second Measurement | <i>P</i> * | ICC   | 95% LoA      |
|------------------------------------------|-------------------|--------------------|------------|-------|--------------|
| <b>Anterior chamber parameters</b>       |                   |                    |            |       |              |
| ACD (mm)                                 | 2.198±0.328       | 2.208±0.221        | 0.356      | 0.996 | -0.084~0.079 |
| ACW (mm)                                 | 11.421±0.467      | 11.211±0.358       | 0.274      | 0.980 | -0.392~0.496 |
| ACA (mm <sup>2</sup> )                   | 15.102±3.264      | 15.052±3.230       | 0.241      | 0.992 | -0.749~0.850 |
| <b>Lens parameters</b>                   |                   |                    |            |       |              |
| LV (mm)                                  | 0.656±0.286       | 0.669±0.387        | 0.673      | 0.998 | -0.063~0.059 |
| LT (mm)                                  | 4.883±0.383       | 4.712±0.432        | 0.659      | 0.951 | -0.344~0.487 |
| <b>Anterior chamber angle parameters</b> |                   |                    |            |       |              |
| NAOD500µm (mm)                           | 0.186±0.133       | 0.155±0.161        | 0.378      | 0.886 | -0.085~0.099 |
| TAOD500µm (mm)                           | 0.160±0.123       | 0.171±0.230        | 0.296      | 0.890 | -0.074~0.061 |
| NARA750µm (mm <sup>2</sup> )             | 0.049±0.038       | 0.040±0.029        | 0.100      | 0.831 | -0.030~0.047 |
| TARA750µm (mm <sup>2</sup> )             | 0.039±0.039       | 0.036±0.036        | 0.166      | 0.868 | -0.035~0.041 |
| <b>Iris parameters</b>                   |                   |                    |            |       |              |
| PD (mm)                                  | 3.720±1.111       | 3.717±1.071        | 0.356      | 0.991 | -0.039~0.042 |
| NIT500µm (mm)                            | 0.418±0.083       | 0.409±0.101        | 0.785      | 0.991 | -0.088~0.098 |
| TIT500µm (mm)                            | 0.432±0.084       | 0.440±0.075        | 0.569      | 0.995 | -0.087~0.069 |
| NIT750µm (mm)                            | 0.431±0.088       | 0.427±0.092        | 0.298      | 0.945 | -0.088~0.069 |
| TIT750µm (mm)                            | 0.450±0.093       | 0.469±0.085        | 0.389      | 0.967 | -0.099~0.058 |
| NIT1000µm (mm)                           | 0.442±0.090       | 0.431±0.072        | 0.527      | 0.933 | -0.092~0.107 |
| TIT1000µm (mm)                           | 0.462±0.094       | 0.449±0.089        | 0.298      | 0.924 | -0.085~0.112 |
| NIC (mm)                                 | 0.287±0.084       | 0.284±0.084        | 0.455      | 0.899 | -0.009~0.012 |
| TIC (mm)                                 | 0.242±0.076       | 0.240±0.058        | 0.742      | 0.906 | -0.011~0.014 |

|                            |             |             |       |       |              |
|----------------------------|-------------|-------------|-------|-------|--------------|
| NI-area (mm <sup>2</sup> ) | 1.804±0.243 | 1.792±0.240 | 0.266 | 0.906 | -0.193~0.217 |
| TI-area (mm <sup>2</sup> ) | 1.715±0.232 | 1.700±0.225 | 0.178 | 0.890 | -0.194~0.225 |

\* Paired *t*-test

**ACD:** Anterior chamber depth

**ACW:** Anterior chamber width

**ACA:** Anterior chamber cross-sectional area

**LV:** Lens vault

**LT:** Lens thickness

**NAOD500µm:** Angle opening distance 500µm from the scleral spur on nasal side

**TAOD500µm:** Angle opening distance 500µm from the scleral spur on temporal side

**NARA750µm:** Angle recess area 750µm from the scleral spur on nasal side

**TARA750µm:** Angle recess area 750µm from the scleral spur on temporal side

**PD:** Pupil diameter

**NIT500µm:** Iris thickness 500µm from the iris root on nasal side

**TIT500 $\mu$ m:** Iris thickness 500 $\mu$ m from the iris root on temporal side

**NIT750 $\mu$ m:** Iris thickness 750 $\mu$ m from the iris root on nasal side

**TIT750 $\mu$ m:** Iris thickness 750 $\mu$ m from the iris root on temporal side

**NIT 1000 $\mu$ m:** Iris thickness 1000 $\mu$ m from the iris root on nasal side

**TIT 1000 $\mu$ m:** Iris thickness 1000 $\mu$ m from the iris root on temporal side

**NIC:** Iris curvature on nasal side

**TIC:** Iris curvature on temporal side

**NI-area:** Iris cross-sectional area on nasal side

**TI-area:** Iris cross-sectional area on temporal side
